# Supplementary material
Source: Springer Nature journal article supplement (https://www.springermedizin.de/resource/supplementary/12936_2010_1417_MOESM4_ESM.pdf/9549758)
Supplement: MOESM4 [file 9549758]

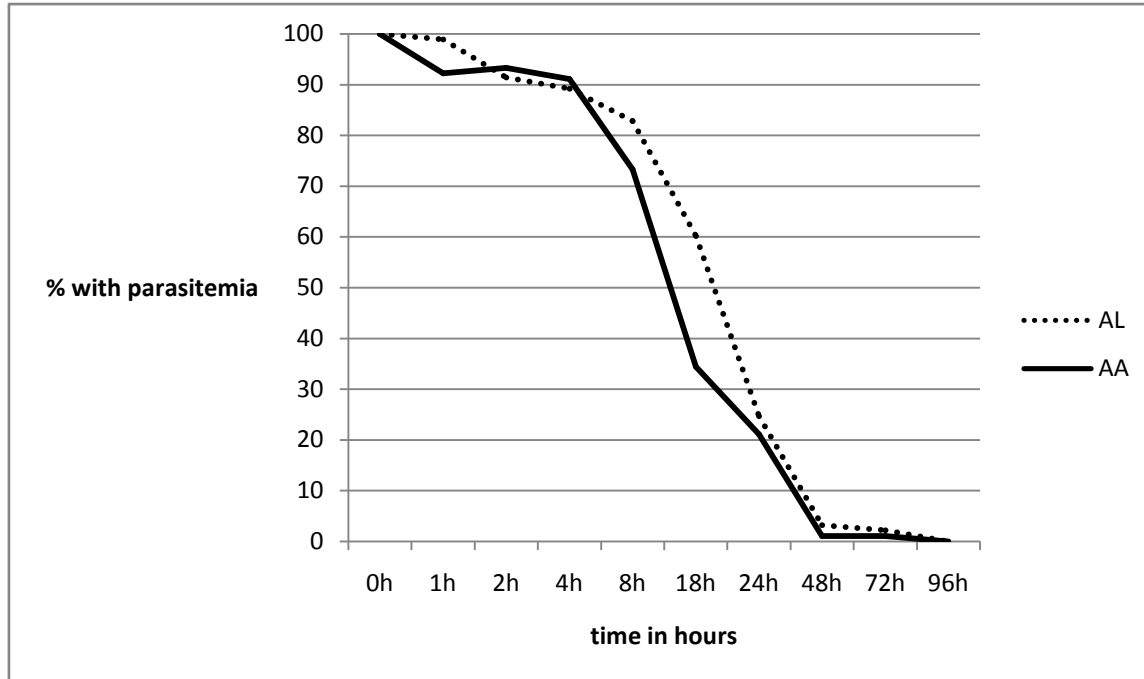

**Fig 4. Proportion of children with peripheral asexual parasitemia plotted against time (hours). More children treated with AL showed parasitaemia between 8 and 24 hours post-treatment compared to those treated with AA, although the difference was not statistically significant between the two groups.**
